# Supplementary material for: Aqueous–organic hybrid electrolyte stabilizing zinc metal anodes
Source: Royal Society of Chemistry journal article supplement (doi:10.1039/d5cc02088c), 2025-01-01
Supplement: d5cc02088c1.pdf [file d5cc02088c1.pdf]

## Supporting Information

### Aqueous-Organic Hybrid Electrolyte Stabilizing Zinc Metal Anodes

Liwen Hu,<sup>a</sup> Yaping Song,<sup>a</sup> Xinyue Li,<sup>a</sup> Keming Hu,<sup>c</sup> and Yang Song,<sup>\*ab</sup>

a. College of Materials Science and Engineering, Chongqing University, Chongqing 400044, PR China.

b. National Innovation Center for Industry-Education Integration of Energy Storage Technology, Chongqing University, Chongqing, 400044, China.

c. Carlson school of management, University of Minnesota, twin cities, Minnesota, 55455, USA.

Corresponding author Email: [ysong0423@cqu.edu.cn](mailto:ysong0423@cqu.edu.cn).

## Experimental Section

**Electrolyte synthesis.** Hydrated zinc tetrafluoroborate ( $\text{Zn}(\text{BF}_4)_2 \cdot x\text{H}_2\text{O}$ , chemically pure), and DMF (analytical reagents,  $\geq 99\%$ ) were purchased from Aladdin. Deionized water was used as the solvent to prepare the aqueous electrolytes. A series of DMF/ $\text{H}_2\text{O}$  solvents were prepared by regulating the volume ratios ( $V_{\text{DMF}}: V_{\text{H}_2\text{O}}$ ) of 10: 1, 9: 1, 8: 1, 4:1. The mixture was subsequently sealed in a glass container and agitated for a duration of four hours, resulting in a transparent and uniform solution. Electrolytes with varying  $\text{Zn}(\text{BF}_4)_2$  concentrations-0.23M, 0.44 M, 0.81 M, 1.22 M, 1.65 M, and 2.53 M-were formulated by adding incremental amounts of  $\text{Zn}(\text{BF}_4)_2 \cdot x\text{H}_2\text{O}$  to the DMF/ $\text{H}_2\text{O}$  base electrolyte with the volume ratios of 8: 1. For instance, the 0.44 M electrolyte was produced by incorporating 3.034 g of  $\text{Zn}(\text{BF}_4)_2 \cdot x\text{H}_2\text{O}$  into 18 ml of DMF/ $\text{H}_2\text{O}$  ( $V_{\text{DMF}}: V_{\text{H}_2\text{O}}=8: 1$ ), followed by stirring for four hours, resulting in a uniform and transparent solution.

**Characterization.** The morphologies of the as-prepared samples were studied with Scanning Electron Microscopy (SEM, 5 kV, Quattro S). X-ray diffraction (XRD) tests were performed on a Rigaku SmartLab diffractometer using Cu Ka radiation ( $\lambda = 1.54178\text{\AA}$ ). Fourier-transform infrared spectroscopy (FTIR) was performed on a Bruker Alpha-P instrument with attenuated total reflection (ATR) technology in the frequency range of  $400\text{--}4000\text{ cm}^{-1}$ . TGA was performed on a Mettler Toledo TGA-DSC analyser under a nitrogen atmosphere. The valence state and chemical composition were analyzed by X-ray photoelectron spectroscopy (XPS, Thermo Kalpha), with binding energies referenced to the C 1s peak at 284.8 eV. The Raman spectra were collected using a LabRAM HR Evolution spectrometer with a 532 nm laser.

**Electrochemical measurements.** We performed electrochemical evaluations on both symmetric and half-cell configurations using CR2032 coin cells, separated by a Whatman GF/A glass fiber and immersed in various concentrations of  $\text{Zn}(\text{BF}_4)_2$  DMF/ $\text{H}_2\text{O}$  electrolyte or aqueous electrolytes. The electrochemical tests, including LSV and Tafel were conducted at  $30\text{ }^\circ\text{C}$  using either Chenhua CHI-660E electrochemical workstation or a Neware battery testing system. LSV measurements utilized a three-electrode setup, operating at a scan rate of  $10\text{ mV s}^{-1}$ . For full cells, we used an electrolyte composed of either with/without DMF mixed with 0.44 M  $\text{Zn}(\text{BF}_4)_2 \cdot x\text{H}_2\text{O}$ .

**DFT calculations:** *DFT calculations:* Density functional theory (DFT) was used to calculate the binding energy and visualize the electrostatic potential maps, which was implemented by the Dmol3 program packaging in Materials Studio. In our work, BLYP with hybrid density functional method, had been adopted to optimize the geometries in these structures. The Binding energies were obtained by  $E_{b-e} = E_{A-B} - (E_A + E_B)$ , where  $E_{A-B}$ ,  $E_A$  and  $E_B$  are the energies of the A-B species binding, the energy of the A species and the energy of the B species, respectively.

**Molecular dynamic simulations related details:** Molecular dynamic simulations were performed using the Forcite module in Materials Studio. The force field and charge were set for each molecule, and the force field type was set to COMPASSII. According to the molecular ratios in the experiment, the molecules were mixed in a cubic box. As shown in the **Table S1**. In the process of molecular dynamic simulation, the 5000-step steepest descent method and 5000-step conjugate gradient method were used to avoid unreasonable contact of the system. A NVT ensemble was carried out at 298 K for 1 ns. The NPT ensemble was used at 298 K for 50 ns, the pressure was maintained at 1 atm, and the integral step is 1 fs. The final 30 ns production trajectories were used to calculate radial distribution functions (RDF) and coordination structure counting analyses.

**Physical field simulation modeling and calculation related details:** The electrochemical reaction kinetic of zinc species at the anode interface in zinc metal batteries were modeled using COMSOL Multiphysics 6.2, a software for multi-physics field coupling simulations. The dimensions of the two-dimensional model, which encompassed concentration, electric field distribution, and zinc deposition analysis, were set at 45×25 μm. In this model, the relevant physical property parameters are detailed in **Table S2**.

## Results and Discussion

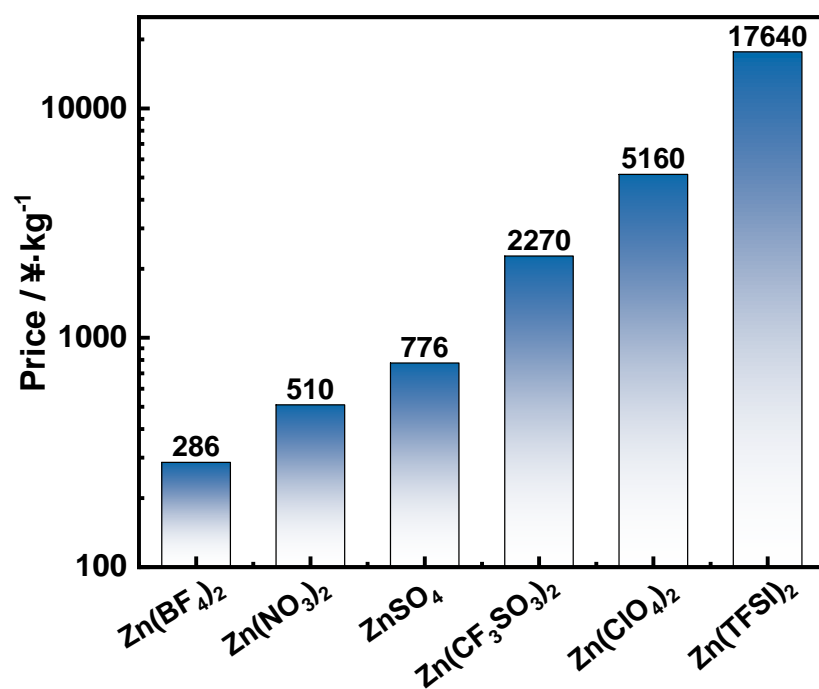

Fig. S1 Price of various Zn salts

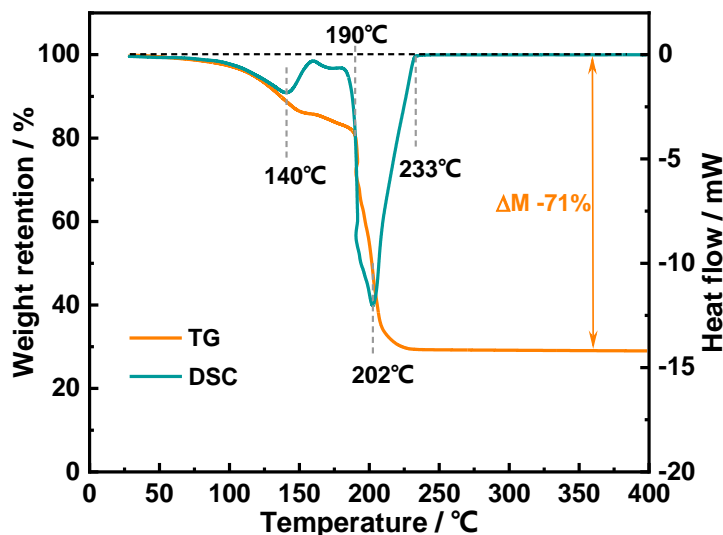

**Fig. S2** TGA curve of the hydrated  $\text{Zn}(\text{BF}_4)_2$  salt.

In the TGA curve, the first weight loss is attributed to partial release of water below 120  $^{\circ}\text{C}$ . The second weight loss at 160~200  $^{\circ}\text{C}$  is due to both the release of more hydrated water and the decomposition of  $\text{Zn}(\text{BF}_4)_2$ . As shown in the XRD result, the residual solid after TGA is entirely  $\text{ZnF}_2$ . According to the weight of  $\text{ZnF}_2$ , the contents of  $\text{Zn}(\text{BF}_4)_2$  and water in the hydrated salt can be calculated based on the mass conservation law using the equation of  $x = n_3/n_2 = (m_3/M_3)/(m_2/M_2) = [(a - M_2b/M_1)/M_3]/(b/M_1) = (M_1a - M_2b)/(M_3b)$ , where  $x$  is the molar ratio of water to  $\text{Zn}(\text{BF}_4)_2$  in the hydrated  $\text{Zn}(\text{BF}_4)_2$  salt;  $n_2$  and  $n_3$  are the amount of  $\text{Zn}(\text{BF}_4)_2$  and  $\text{H}_2\text{O}$ , respectively;  $m_2$  and  $m_3$  are the mass of  $\text{Zn}(\text{BF}_4)_2$  and  $\text{H}_2\text{O}$ , respectively;  $M_1$ ,  $M_2$  and  $M_3$  are the molar mass of  $\text{ZnF}_2$ ,  $\text{Zn}(\text{BF}_4)_2$  and  $\text{H}_2\text{O}$ , respectively;  $a$  is the weight of the pristine hydrated  $\text{Zn}(\text{BF}_4)_2$  salt;  $b$  is the weight of the residual  $\text{ZnF}_2$  after TGA test. Accordingly, the  $x$  value in the hydrated  $\text{Zn}(\text{BF}_4)_2$  salt is 6.5.

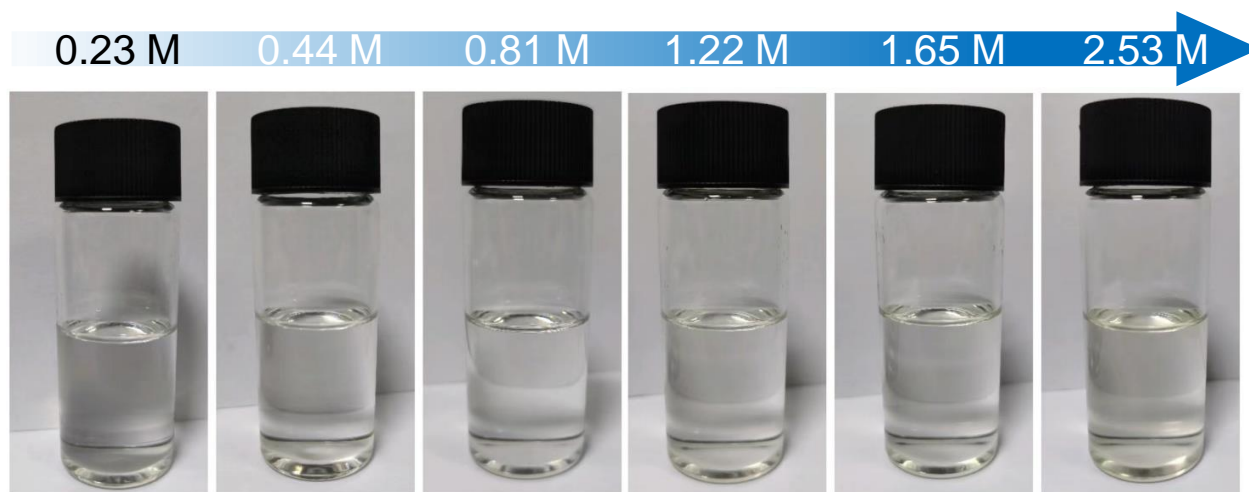

**Fig. S3** The optical photographs of different  $C_{Zn(BF_4)_2}$  electrolyte at  $30^\circ C$

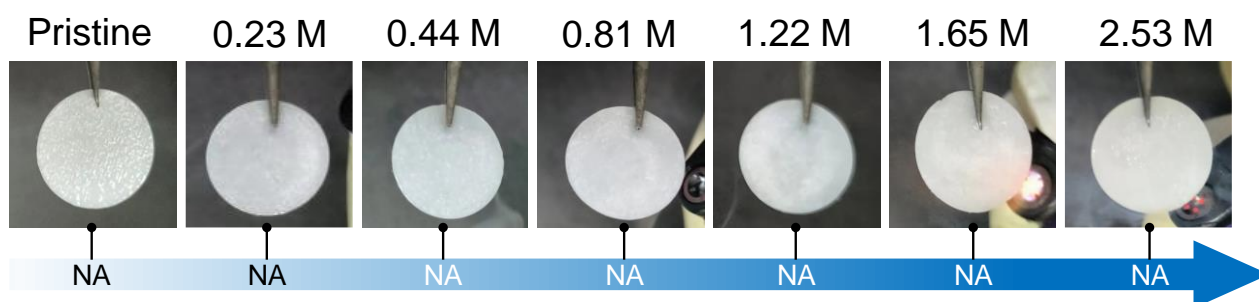

**Fig. S4** Ignition tests of glass fiber separators using  $C_{Zn(BF_4)_2}$  electrolyte

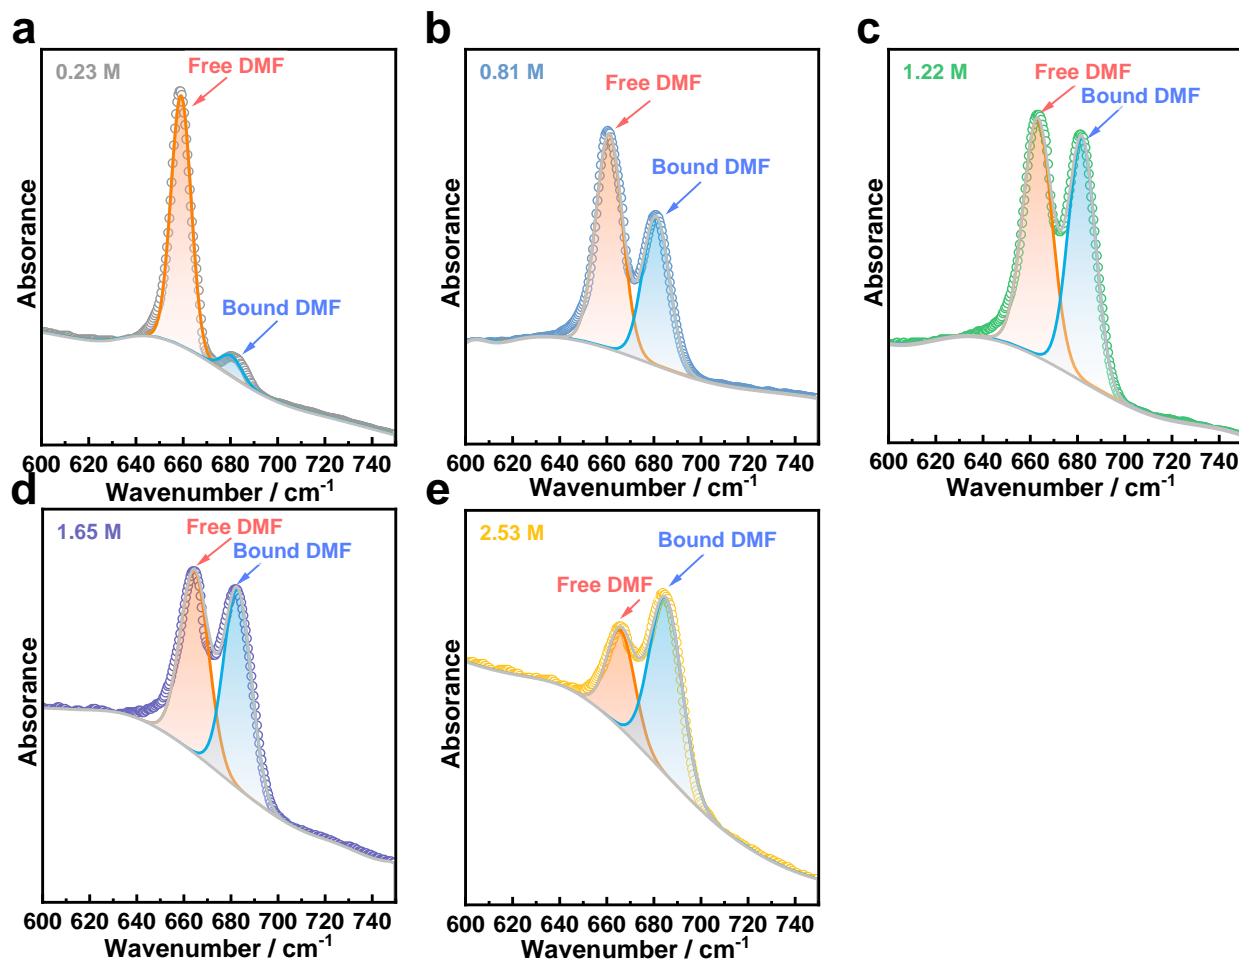

**Fig. S5** The fitted peaks of ATR-FTIR spectra of various  $C_{Zn(BF_4)_2}$  electrolyte: a) 0.23 M; b) 0.81 M; c) 1.22 M; d) 1.65 M; e) 2.53 M;



**Table S1** The electrolyte with/without DMF model systems simulated in this work

| System                    | Zn <sup>2+</sup> | BF <sub>4</sub> <sup>-</sup> | H <sub>2</sub> O | DMF |
|---------------------------|------------------|------------------------------|------------------|-----|
| DMF/H <sub>2</sub> O 8: 1 | 6                | 12                           | 117              | 146 |
| DMF/H <sub>2</sub> O 4: 1 | 6                | 12                           | 192              | 143 |
| DMF/H <sub>2</sub> O 2: 1 | 6                | 12                           | 294              | 119 |
| AEs                       | 6                | 12                           | 804              | \   |

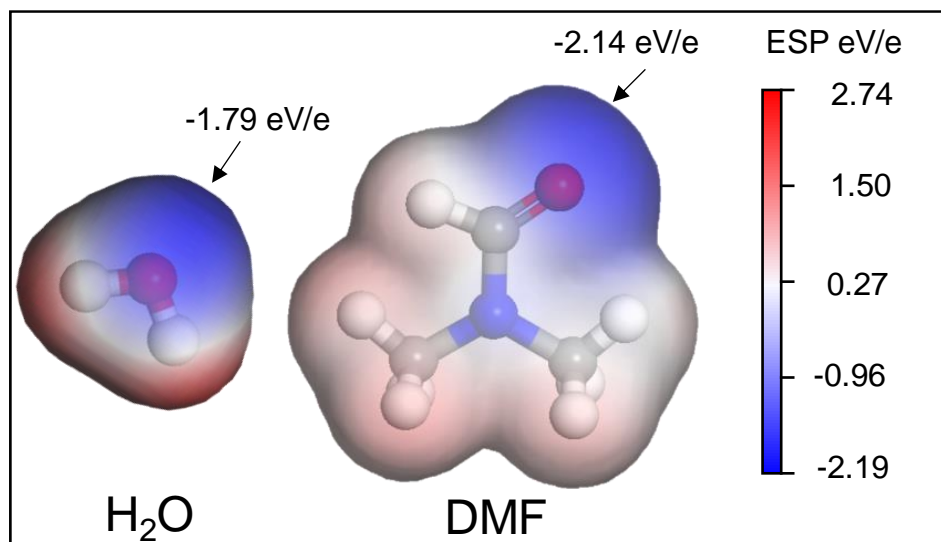

**Fig. S6** ESP distribution of H<sub>2</sub>O and DMF, Red and blue colors of the scale bar reflect higher and lower potential, respectively

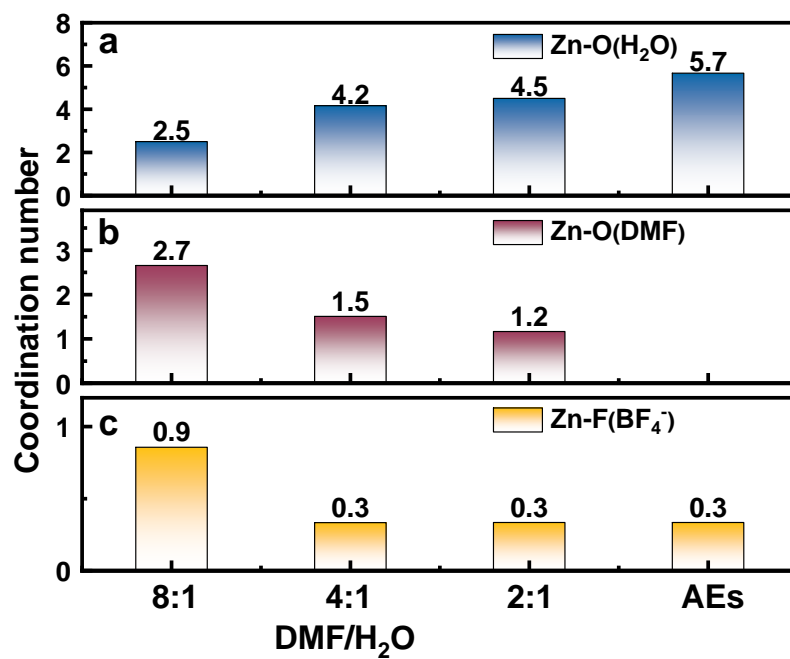

**Fig. S7** The CN of a) Zn<sup>2+</sup>-H<sub>2</sub>O; b) Zn<sup>2+</sup>-DMF; c) Zn<sup>2+</sup>-BF<sub>4</sub><sup>-</sup> collected from MD simulations with various molar ratio of DMF to H<sub>2</sub>O electrolytes

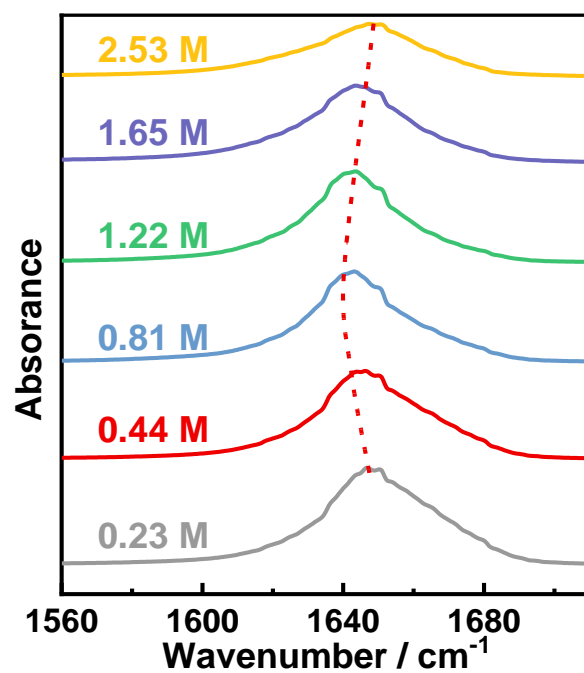

**Fig. S8** ATR-FTIR spectra from 1560 ~ 1700  $cm^{-1}$  of various  $C_{Zn(BF_4)_2}$

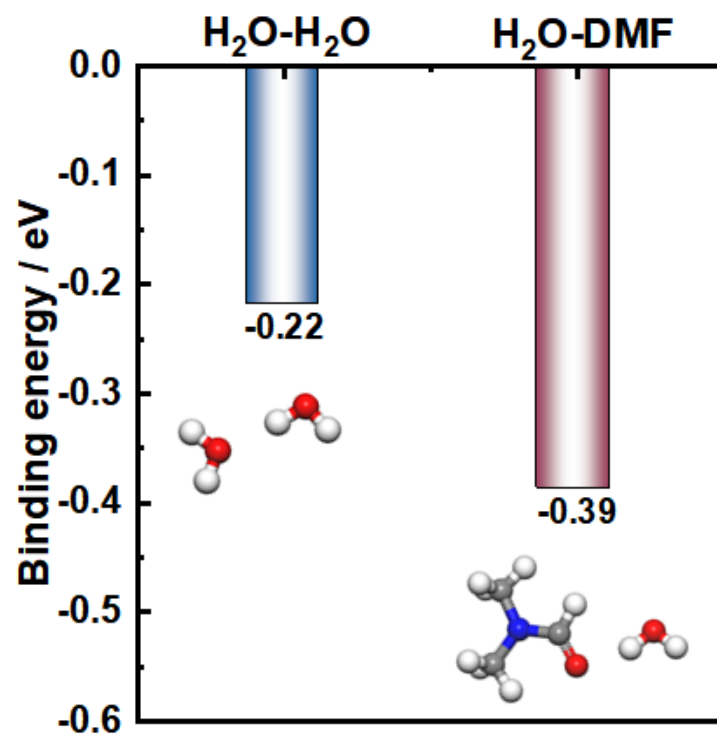

**Fig. S9** The calculated binding energy of H<sub>2</sub>O-H<sub>2</sub>O, H<sub>2</sub>O-DMF

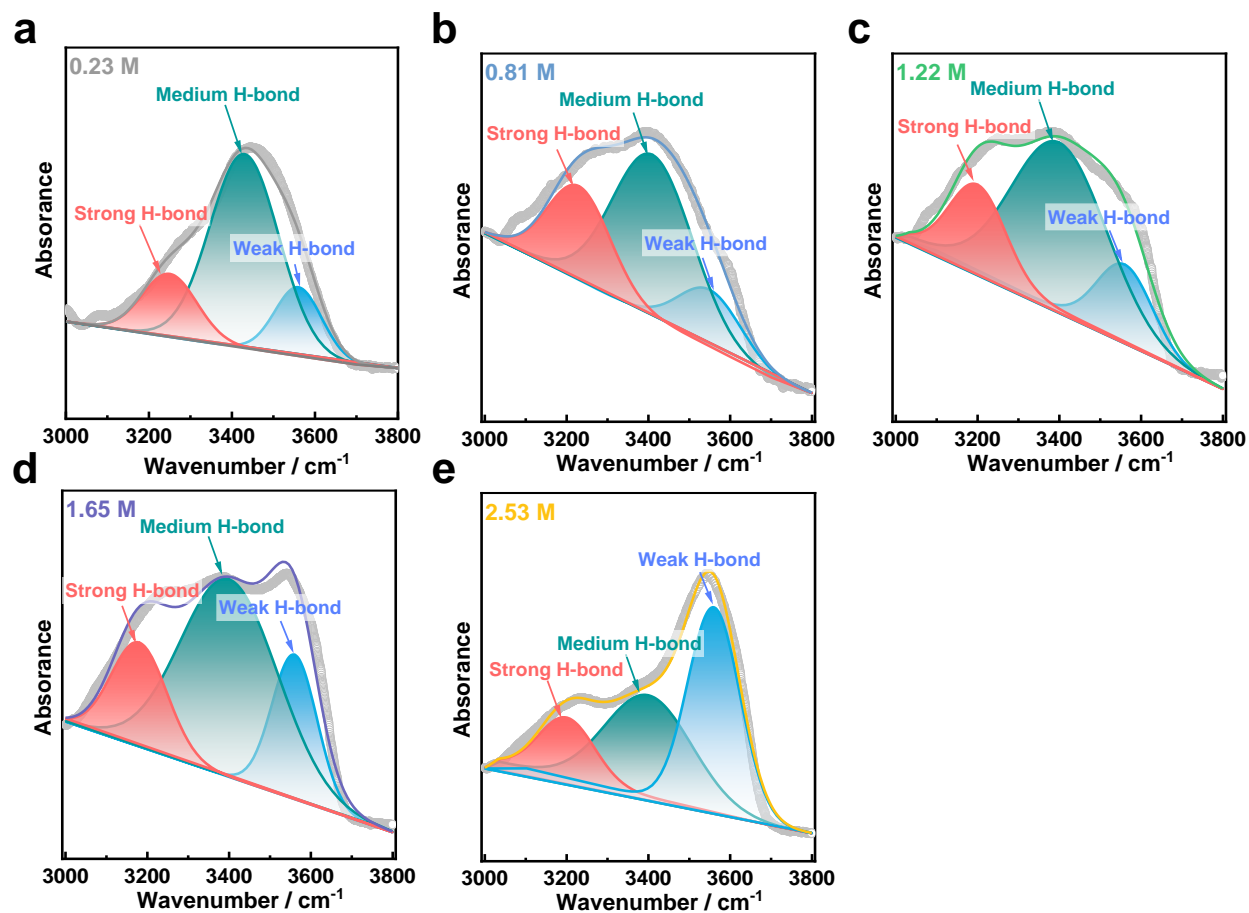

**Fig. S10** The fitted peaks of ATR-FTIR spectra of various  $C_{Zn(BF_4)_2}$  electrolyte: a) 0.23 M; b) 0.81 M; c) 1.22 M; d) 1.65 M; e) 2.53 M;

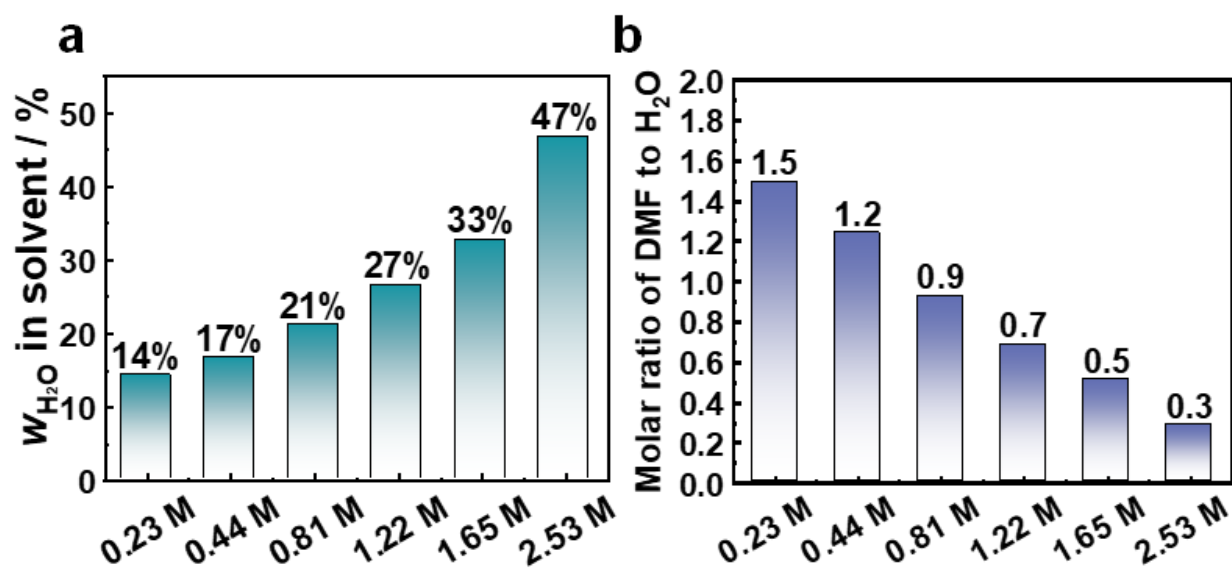

**Fig. S11** a) Mass percent of water in solvent with various  $C_{Zn(BF_4)_2}$ ; b) Molar ratio of DMF to  $H_2O$  with various  $C_{Zn(BF_4)_2}$

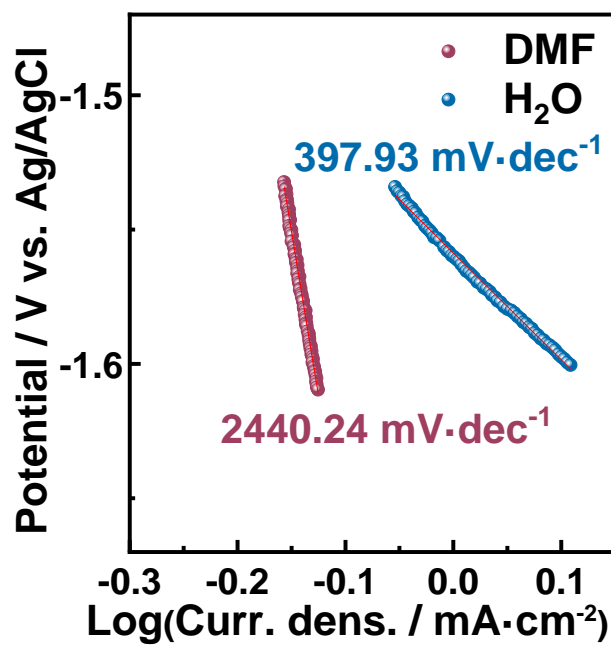

**Fig. S12** Corresponding Tafel slope curves with/without DMF



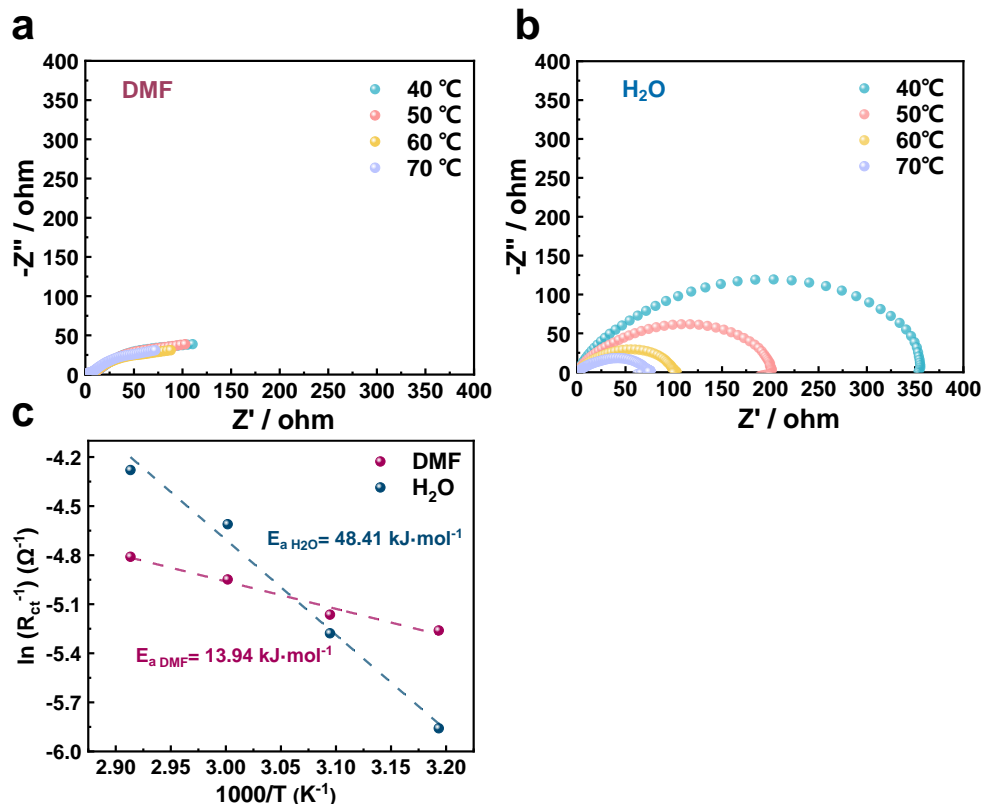

**Fig. S13** a, b) Nyquist plots of Zn||Zn symmetric cells with/without DMF at different temperatures and c) the desolvation activation energy that was calculated according to the Arrhenius equation.

The de-solvation energy of  $\text{Zn}^{2+}$  ions was determined through temperature-dependent electrochemical impedance spectroscopy (EIS) measurements. Based on the Arrhenius equation ( $1/R_{ct} = A \exp(-E_a/RT)$ ), where  $R_{ct}$  represents charge transfer resistance derived from the semicircle in Nyquist plots (Figs.S13a and b), and  $A$ ,  $T$ ,  $R$ , and  $E_a$  denote the pre-exponential factor, absolute temperature, ideal gas constant, and activation energy, respectively, the activation energies ( $E_a$ ) for Zn||Zn symmetric cells were calculated as  $13.94 \text{ kJ mol}^{-1}$  in 0.44 M DMF/ $\text{H}_2\text{O}$  electrolyte versus  $48.41 \text{ kJ mol}^{-1}$  in aqueous electrolyte (Fig. S13c). The reduced  $E_a$  value ( $\Delta 34.47 \text{ kJ mol}^{-1}$ ) confirms that  $\text{ZnF}_2$ -enriched solid electrolyte interphase (SEI) formation significantly enhances interfacial redox kinetics

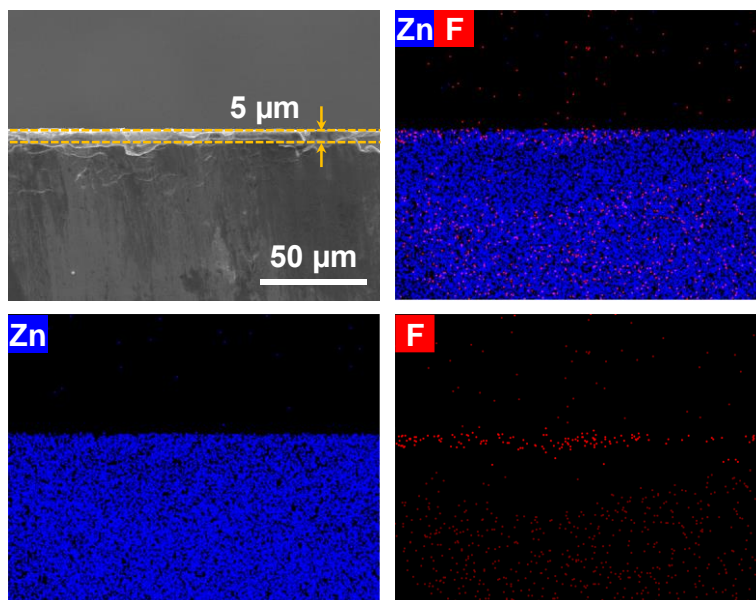

**Fig. S14** SEM and EDS mapping of Zn anode after immersion in  $\text{Zn}(\text{BF}_4)_2\text{-DMF}$

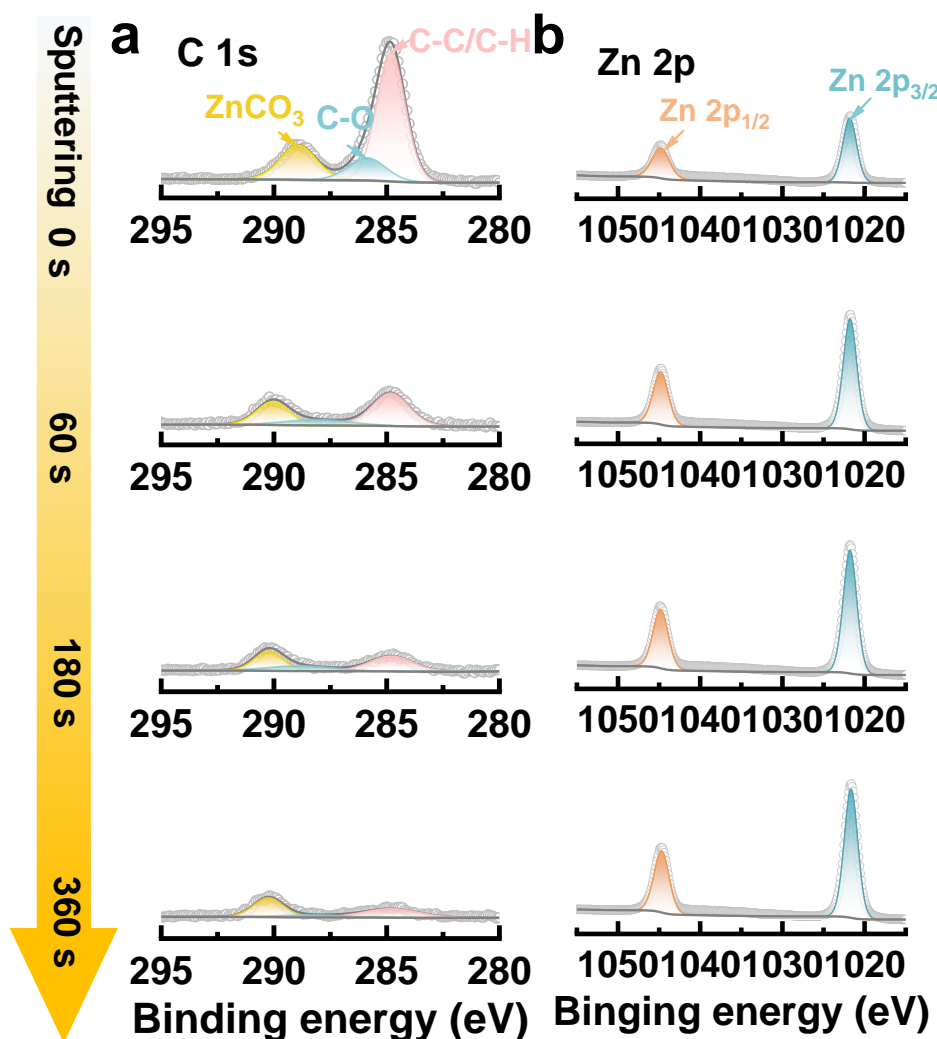

**Fig. S15** Depth-profiling XPS spectra of a) C 1 s, b) Zn 2p of the Zn anode immersion with Zn(BF<sub>4</sub>)<sub>2</sub>-DMF

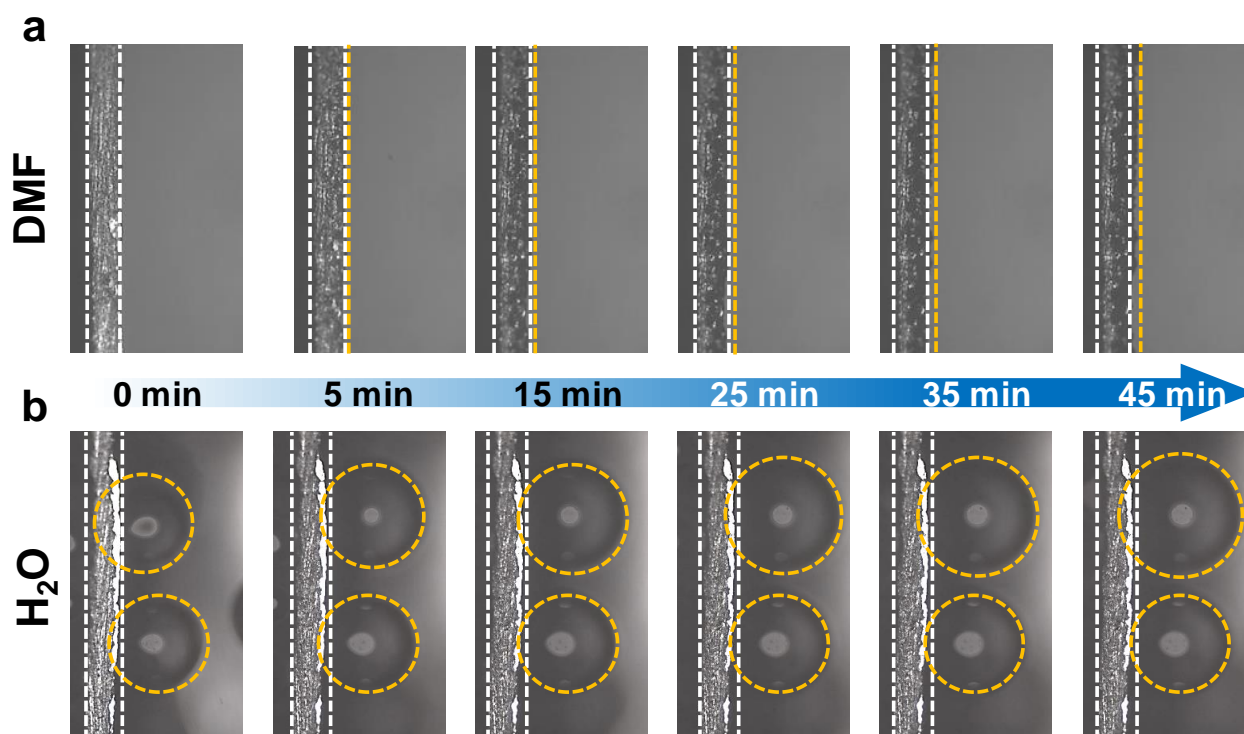

**Fig. S16** In situ observations of zinc deposition in **a)** DMF-based electrolyte and **b)** AEs.

**Table S2** Physicochemical properties with/without DMF of 0.44 M Zn(BF<sub>4</sub>)<sub>2</sub> electrolytes.

| System    | $C_{\text{Zn(BF}_4)_2} / \text{mol} \cdot \text{m}^{-3}$ | $E^0 / \text{mV}$ | $j^0 / \text{A} \cdot \text{m}^{-2}$ | Ionic conductivity / $\text{S} \cdot \text{m}^{-1}$ | Diffusion coefficient / $\text{m}^2 \cdot \text{s}^{-1}$ |
|-----------|----------------------------------------------------------|-------------------|--------------------------------------|-----------------------------------------------------|----------------------------------------------------------|
| AEs       | 440                                                      | -56               | 21.78                                | 10.21                                               | 5.73E-12                                                 |
| DMF-based | 440                                                      | -7                | 65.46                                | 2.120                                               | 8.60E-12                                                 |

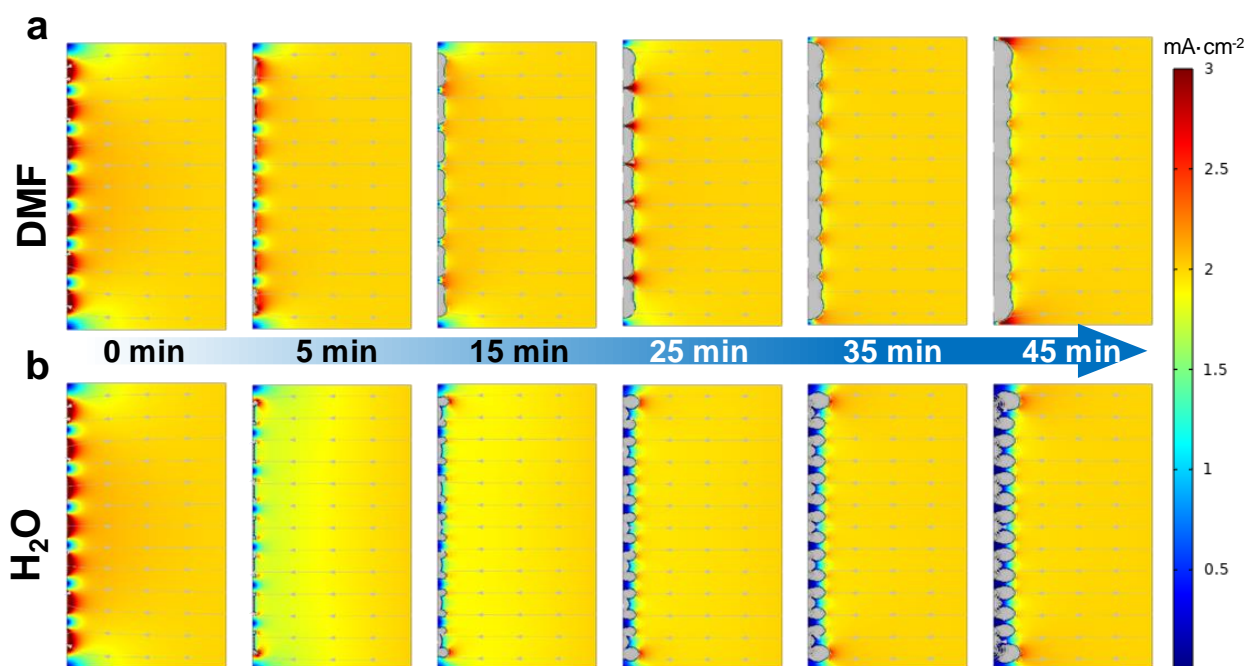

**Fig. S17** The corresponding simulated morphology with distribution of current density with **a)** DMF-based electrolyte; **b)** with AEs

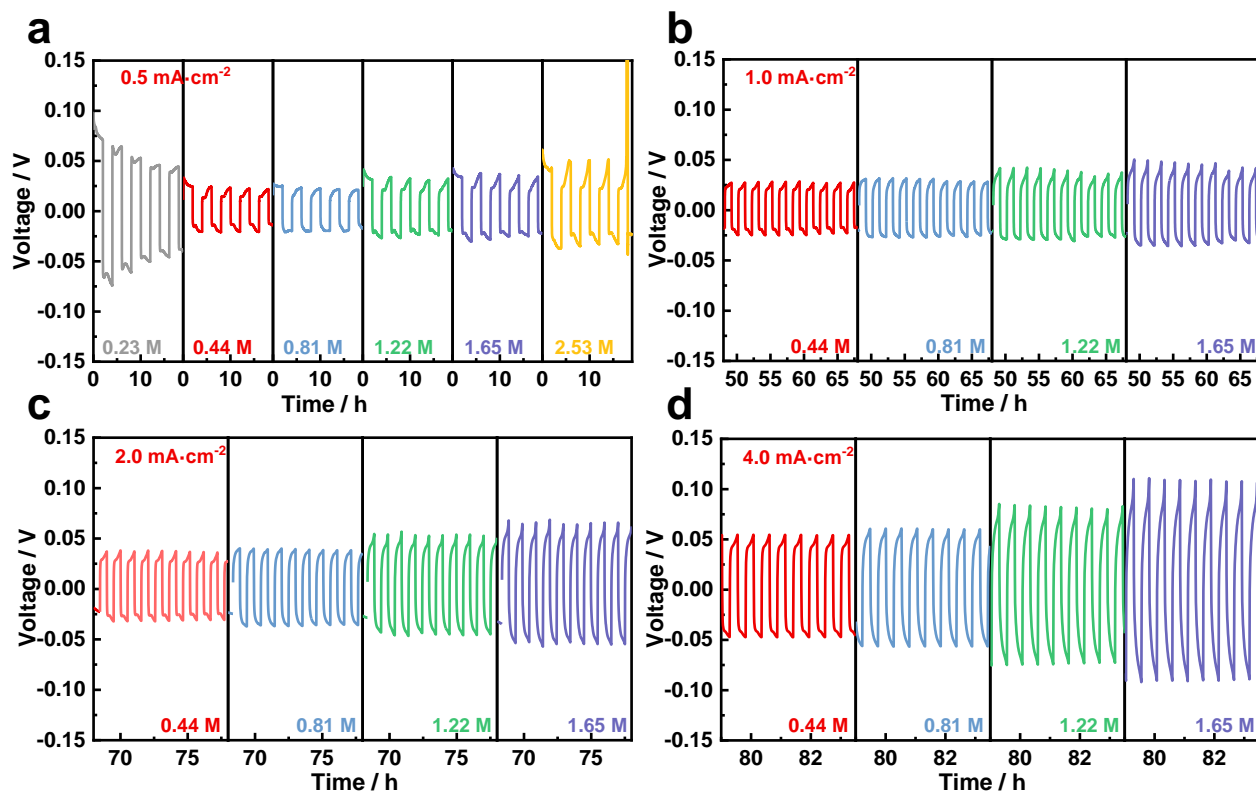

**Fig. S18** Voltage-capacity curves for different  $C_{\text{Zn}(\text{BF}_4)_2}$  electrolytes for different current density, a)  $0.5 \text{ mA cm}^{-2}$ ; b)  $1.0 \text{ mA cm}^{-2}$ ; c)  $2.0 \text{ mA cm}^{-2}$ ; d)  $4.0 \text{ mA cm}^{-2}$ ;

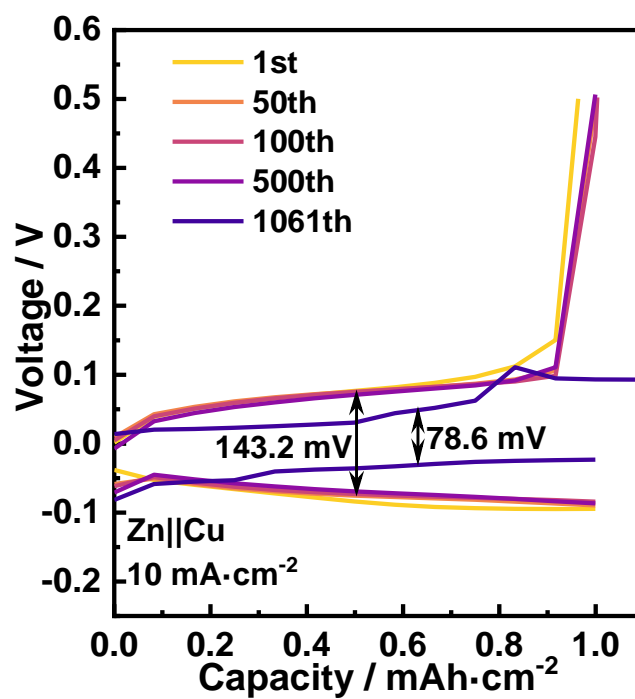

Fig. S19 The voltage profiles without DMF



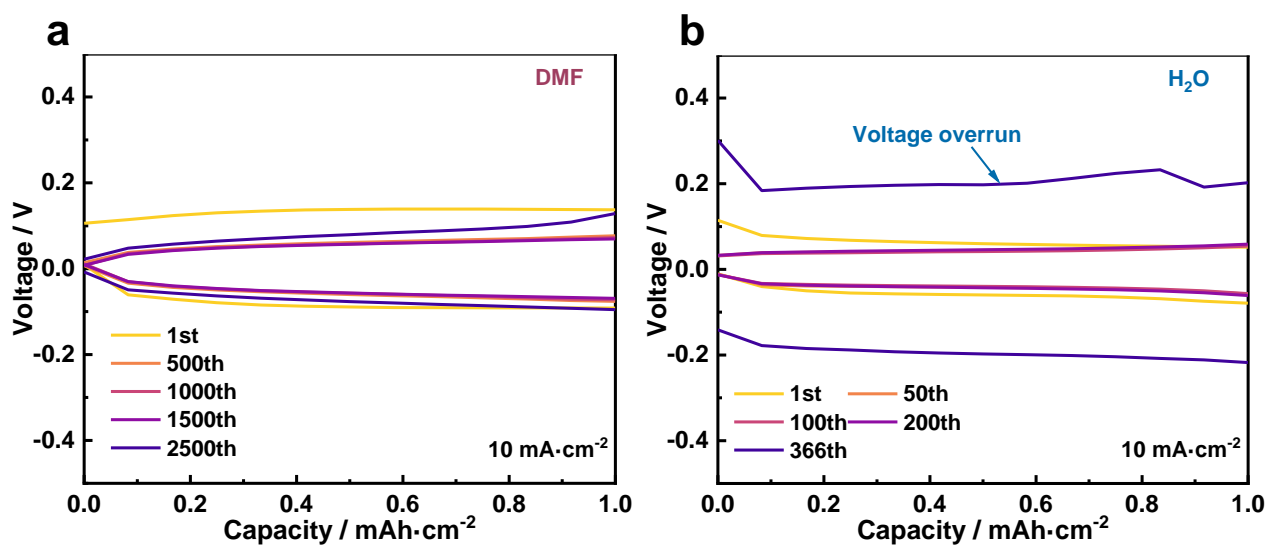

**Fig. S20** Voltage-capacity curves for a) DMF and b) without DMF electrolytes at 10 mA cm<sup>-2</sup> for different cycles;
